# Supplementary material
Source: Springer Nature journal article supplement (https://www.springermedizin.de/resource/supplementary/12985_2010_999_MOESM2_ESM.pdf/9608920)

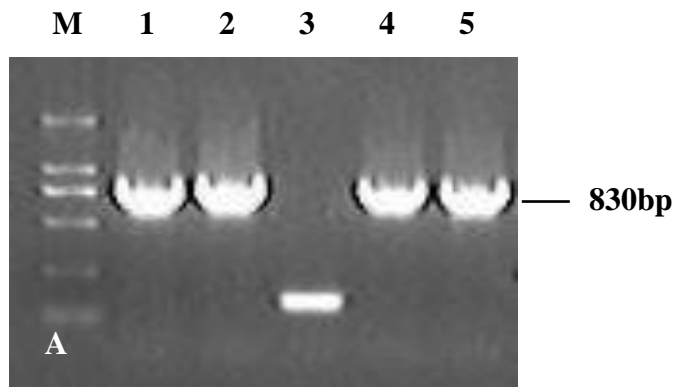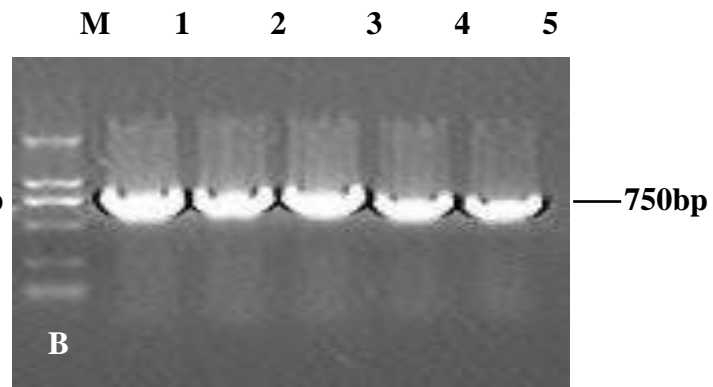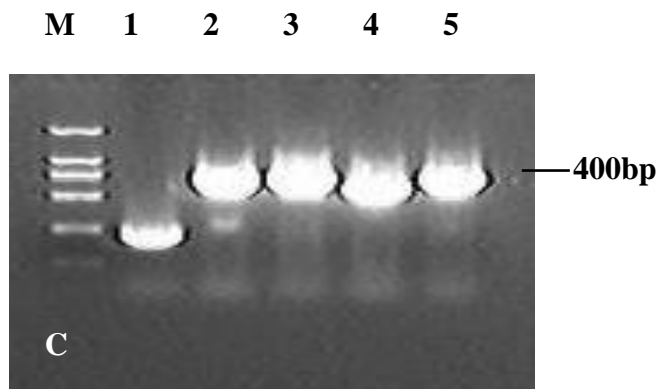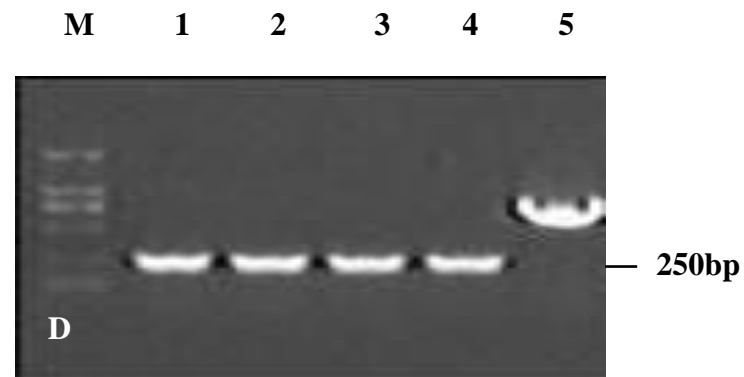

Supplement: MOESM2 [file 9608920]
